# Supplementary material
Source: PubMed Central journal article supplement (PMC6352902)

**Figure S2: Absolute Change in HDL**

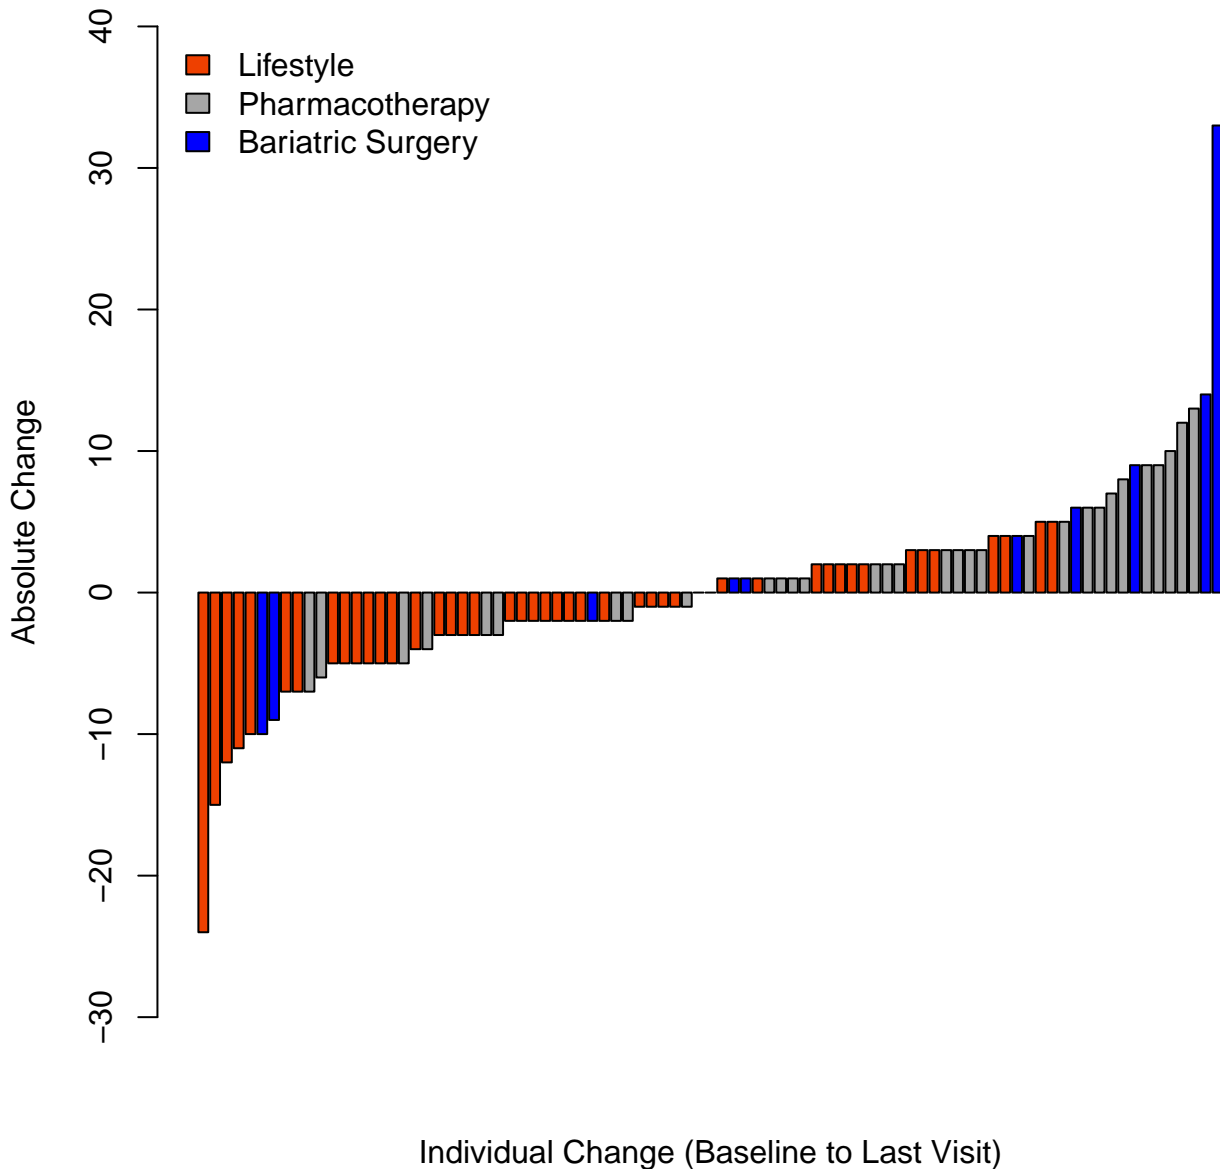

Supplement: NIHMS996066-supplement-Supp_FigS2.pdf [file NIHMS996066-supplement-Supp_FigS2.pdf]

**Figure S3: Absolute Change in LDL**

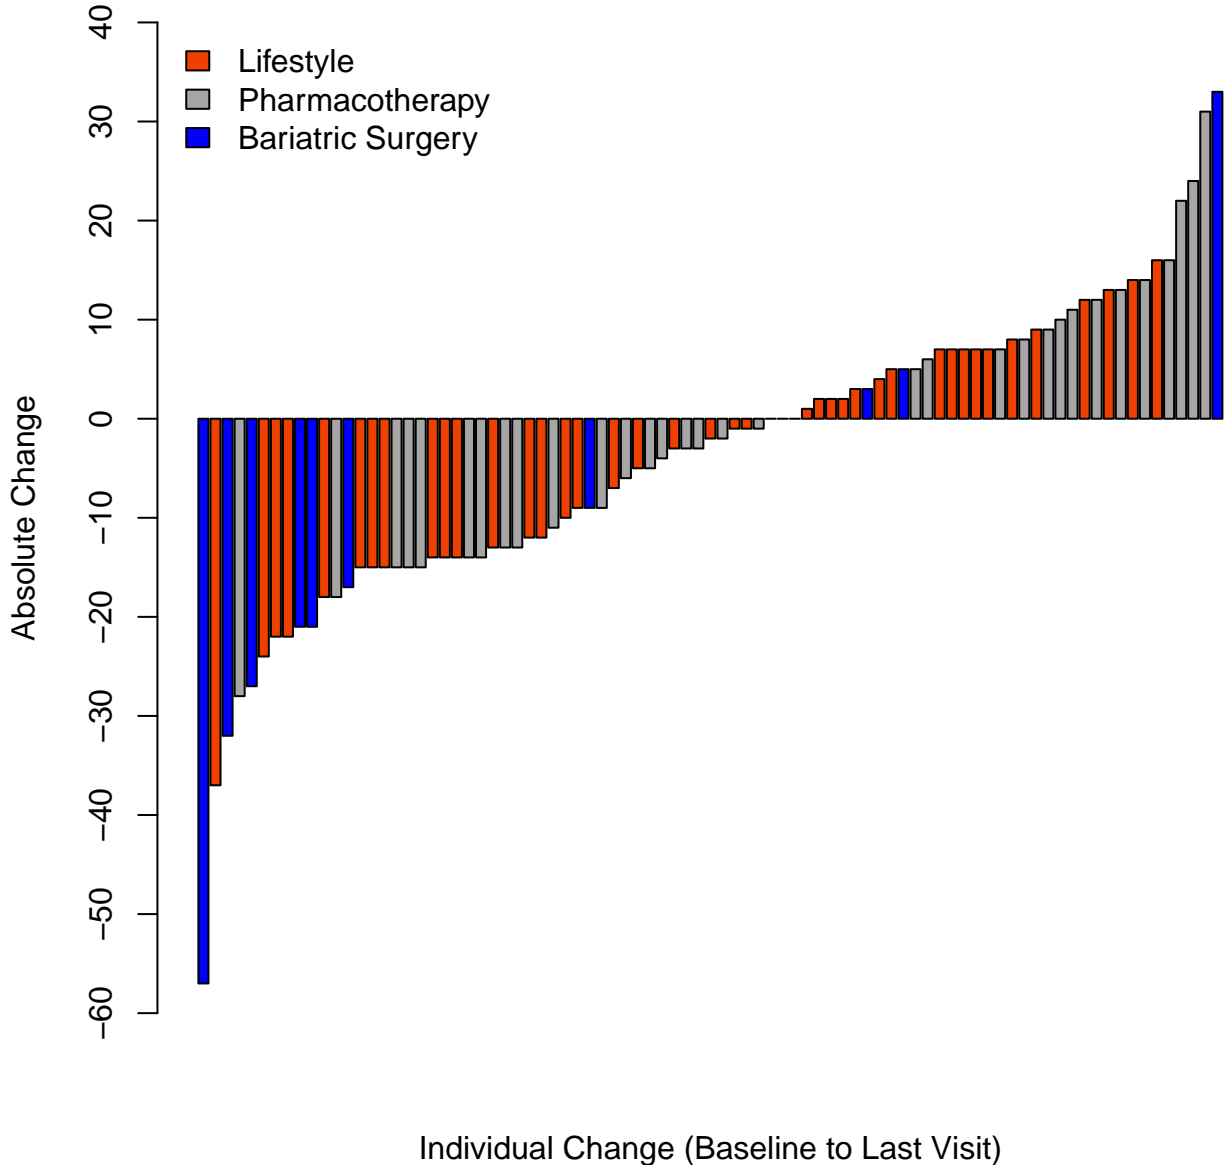

Supplement: NIHMS996066-supplement-Supp_FigS3.pdf [file NIHMS996066-supplement-Supp_FigS3.pdf]

**Figure S6: Absolute Change in Fasting Insulin**

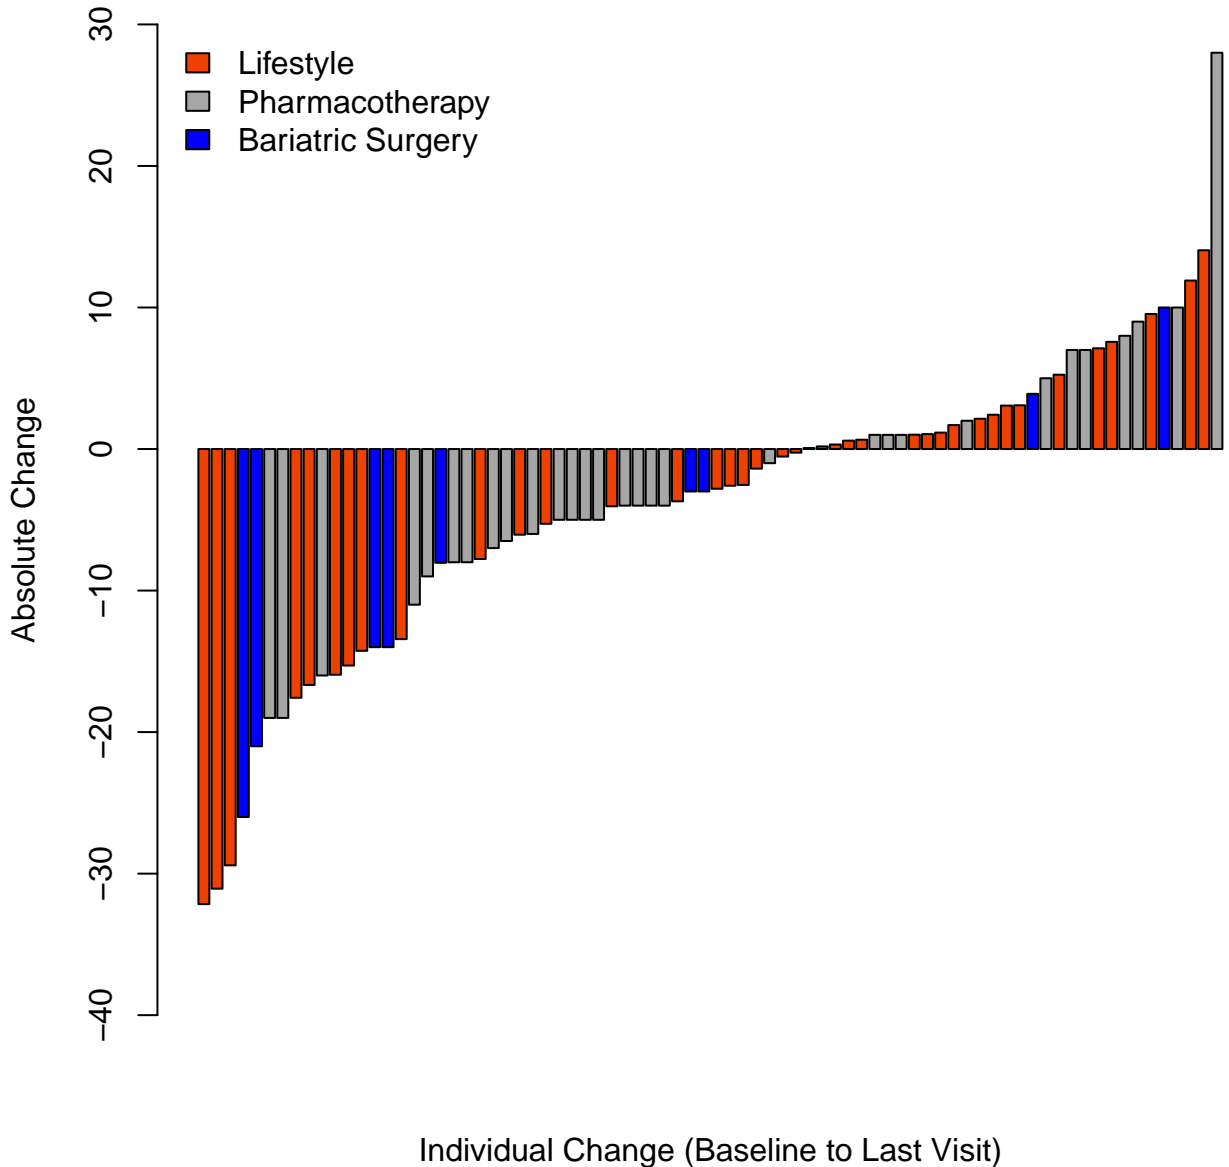

Supplement: NIHMS996066-supplement-Supp_FigS6.pdf [file NIHMS996066-supplement-Supp_FigS6.pdf]
